# Supplementary material
Source: ML conference proceedings conference paper supplement (https://aclanthology.org/D17-1270)
Supplement: Attachment [file gold_majewskaetal.xlsx]

## Sheet: EN
VERBNET CLASS	EXAMPLE VERBS (12)
9.1 PUT	bury, place, install, mount, put, deposit, position, set, situate, immerse, insert, stash
10.1 REMOVE	remove, abolish, discharge, eject, extract, deduct, eradicate, sever, evict, subtract, retract, delete
11.1 SEND	ship, post, send, mail, transmit, transfer, deliver, slip, transport, dispatch, forward, shunt
13.5.1 GET	win, gain, earn, buy, get, book, reserve, fetch, attain, pick, charter, conserve
18.1 HIT	beat, slap, bang, knock, pound, batter, hammer, lash, bash, smack, whack, bump
22.2 AMALGAMATE	contrast, match, overlap, unite, unify, affiliate, integrate, coincide, incorporate, compare, correlate, alternate
29.2 CHARACTERIZE	envisage, portray, regard, treat, enlist, define, depict, diagnose, identify, reinstate, picture, class
30.3 PEER	listen, stare, look, glance, gaze, peer, peek, squint, snoop, gape, leer, peep
31.1 AMUSE	delight, scare, shock, confuse, upset, overwhelm, disappoint, exhaust, intimidate, frighten, stimulate, threaten
36.1 CORRESPOND	cooperate, collide, concur, mate, flirt, interact, dissent, compromise, banter, haggle, commiserate, elope
37.3 MANNER OF SPEAKING	shout, yell, moan, mutter, murmur, snarl, wail, whisper, mumble, grunt, whimper, stutter
37.7 SAY	say, reply, mention, state, report, respond, announce, recount, utter, exclaim, retort, confide
40.2 NONVERBAL EXPRESSION	smile, laugh, grin, sigh, chuckle, frown, giggle, gasp, sneer, yawn, sob, snore
43.1 LIGHT EMISSION	shine, flash, flare, glow, blaze, flicker, gleam, sparkle, glisten, twinkle, glitter, flame
45.4 CHANGE OF STATE /Other-cos	soften, weaken, narrow, deepen, dampen, melt, multiply, strengthen, sharpen, shorten, broaden, freeze
47.3 MODES OF BEING WITH MOTION	quake, falter, sway, swirl, teeter, flutter, wobble, waft, quiver, wiggle, vibrate, oscillate
51.3.2 RUN	swim, fly, walk, slide, run, travel, stroll, glide, jog, march, trot, gallop

## Sheet: PL
VERBNET CLASS	VERBS
9.1 PUT	zakopać, pochować, pogrzebać, umiejscowić, umieścić, ulokować, instalować, montować, osadzać, położyć, ustawić, usytuować, składować, przechowywać, ukryć
10.1 REMOVE	usuwać, likwidować, obalić, zwolnić, wydalać, wydobyć, zrywać, eksmitować, wypędzać, wyrzucać, wycofać, odwoływać, odciąć, wytępić, wyplenić, wyjmować, wypuścić, wyrywać
11.1 SEND	wysyłać, transportować, nadawać, posyłać, przesyłać, transmitować, przenosić, przekazywać, dostarczać, przetaczać, transferować, przewozić, przeładować, doręczać
13.5.1 GET	wygrać, zdobyć, uzyskać, zarobić, kupić, pozyskać, przynosić, zbierać, wynająć, czarterować, wydzierżawić, zachować, nabyć
18.1 HIT	bić, trzepać, uderzać, walić, smagać, grzmocić, klepać, trzaskać, pukać, łomotać, palnąć, chłostać, rąbnąć, łupnąć, stukać, tłuc
22.2 AMALGAMATE	integrować, scalać, zbiegać się, porównywać, jednoczyć, stowarzyszać, zrzeszać, łączyć, korelować, unifikować, przeplatać, zamieniać się, pokrywać, harmonizować, konfrontować, współgrać, wiązać
29.2 CHARACTERIZE	wyobrażać sobie, przedstawiać, identyfikować, rozpoznawać, definiować, określać, prezentować, obrazować, diagnozować, precyzować
30.3 PEER	gapić się, patrzeć, spoglądać, zerkać, spozierać, zezować, wpatrywać się
31.1 AMUSE	stymulować, pobudzać, szokować, mylić, denerwować, przytłaczać, przerażać, przestraszyć, zawieść, rozczarować, zachwycać, wyczerpać, onieśmielać, zastraszyć, urzekać, wycieńczać, wykańczać, zadowalać, satysfakcjonować, poruszać
36.1 CORRESPOND	współpracować, współdziałać, kooperować, kolidować, kłócić się, zgadzać się, flirtować, romansować, spółkować, przekomarzać się, droczyć się, drażnić się, targować się, kojarzyć się, parzyć się
37.3 MANNER OF SPEAKING	krzyczeć, wrzeszczeć, szeptać, mruknąć, mamrotać, warczeć, jęczeć, zawodzić, chrząkać, piszczeć, jąkać, burknąć, wyć, wołać
37.7 SAY	mówić, odpowiadać, odrzekać, odpierać, wspominać, nadmieniać, napomknąć, oznajmić, donieść, ogłaszać, opowiadać, relacjonować, wykrzyknąć, odciąć się, zwierzać się, stwierdzać, komunikować, oświadczać, rzec, wyznać, wyjawiać
40.2 NONVERBAL EXPRESSION	uśmiechać się, śmiać się, szczerzyć się, wzdychać, sapać, chichotać, szydzić, drwić, naśmiewać się, ziewać, szlochać, łkać, chrapać, chlipać, zipać
43.1 LIGHT EMISSION	świecić, błyszczeć, błyskać, płonąć, jarzyć się, mienić się, promienieć, migotać, lśnić, skrzyć się, żarzyć się, migać, rozbłysnąć, tlić się, buchać, gorzeć, szklić się
45.4 CHANGE OF STATE	wzmocnić, zwęzić, osłabić, ścieśnić, pogłębić, topić, mnożyć, powielać, wyostrzyć, skrócić, poszerzyć, rozszerzyć, rozpuścić
47.3 MODES OF BEING WITH MOTION	trząść, chwiać, kołysać, bujać, łopotać, trzepotać, furkotać, wirować, chybotać, podrygiwać, poruszać, pulsować, tętnić, wibrować, telepać, wahać, huśtać
51.3.2 RUN	pływać, latać, fruwać, chodzić, ślizgać się, biegać, podróżować, spacerować, przechadzać się, sunąć, szybować, maszerować, truchtać, kłusować, cwałować, galopować

## Sheet: HR
	VERBNET CLASS	VERBS
	9.1 PUT	pokopati, zakopati, staviti, postaviti, deponirati, pozicionirati, namjestiti, uroniti, umetnuti, pohraniti, smjestiti, metnuti
	10.1 REMOVE	ukloniti, otkloniti, ukinuti, istovariti, izbaciti, izvući, izvaditi, oduzeti, oduzimati, iskorijeniti, odvojiti, istjerati, uvući, izbrisati
	11.1 SEND	slati, poslati, otpremiti, odašiljati, prenijeti, prebaciti, dostaviti, tutnuti, prevoziti, transportirati, proslijediti, dopremiti, uputiti
	13.5.1 GET	dobiti, osvojiti, steći, zaraditi, kupiti, nabaviti, rezervirati, donijeti, dohvatiti, dostići, odabrati, izabrati, unajmiti, zakupiti, čuvati, sačuvati
	18.1 HIT	tući, udariti, pljusnuti, ošamariti, šamarati, lupiti, batinati, zabiti, nabiti, prikucati, išibati, bičevati, tresnuti, zveknuti
	22.2 AMALGAMATE	spojiti, suprotstaviti, razlikovati se, odgovarati, slagati se, preklapati, preplitati, ujediniti, sjediniti, udruživati, pripojiti, uključiti,integrirati, podudarati se, inkorporirati, porediti, usporediti, korelirati, alternirati, izmijenjivati se
	29.2 CHARACTERIZE	razmotriti, predočiti, portretirati, oslikati, smatrati, razmotriti, regrutirati, angažirati, odrediti, definirati, opisati, dijagnosticirati, identificirati, postaviti, predstaviti, klasificirati
	30.3 PEER	slušati, poslušati, buljiti, zuriti, gledati, pogledati, piljiti, motriti, viriti, škiljiti, njuškati, zjapiti, zagledati, proviriti, zaviriti
	31.1 AMUSE	uživati, očarati, uplašiti, šokirati, zaprepastiti, zbuniti, uznemiriti, uzrujati, pobijediti, nadjačati, razočarati, iscrpiti, zastrašiti, zaplašiti, preplašiti, stimulirati, potaknuti, prijetiti, zaprijetiti
	36.1 CORRESPOND	surađivati, sudariti se, složiti se, podudarati se, pariti se, spariti, flertati, koketirati, djelovati, razilaziti se, nagoditi se, podsmjehivati se, cjenkati se, suosjećati, odbjeći
	37.3 MANNER OF SPEAKING	vikati, vrištati, stenjati, jaukati, mrmljati, žagoriti, režati, naricati, šaptati, šaputati, gunđati, roktati, groktati, cviljeti, mucati
	37.7 SAY	reći, kazati, odgovoriti, uzvratiti, spomenuti, iznijeti, iskazati, izvijestiti, najaviti, obavijestiti, obznaniti, ispričati, izustiti, izjaviti, uzviknuti, uzvratiti, povjeriti
	40.2 NONVERBAL EXPRESSION	osmjehnuti se, smješkati se, smijati se, nasmijati se, ceriti se, kesiti se, uzdahnuti, cerekati se, mrštiti se, namrštiti se, hihotati se, dahtati, podsmjehnuti se, zijevati, jecati, ridati, hrkati
	43.1 LIGHT EMISSION	sijati, zasijati, bljesnuti, buknuti, planuti, plamtjeti, svjetlucati, treperiti, presijavati se, blještati, blistati, gorjeti
	45.4 CHANGE OF STATE	ublažiti, smekšati, oslabiti, slabiti, suziti, produbiti, vlažiti, ovlažiti, namočiti, rastopiti, otopiti, rastaliti, topiti, umnožiti, namnožiti, ojačati, učvrstiti, osnažiti, izoštriti, naoštriti, zašiljiti, skratiti, proširiti, raširiti, zamrznuti, smrznuti, zalediti
	47.3 MODES OF BEING WITH MOTION	tresti se, drhtati, posrnuti, njihati, lelujati, vitlati, kovitlati se, klackati se, lepršati, vijoriti se, viti, klimati se, lebdjeti, strujati, treperiti, drhtati, mrdati se, meškoljiti se, koprcati se, vibrirati, titrati, oscilirati
	51.3.2 RUN	plivati, letjeti, hodati, kliznuti, skliznuti, trčati, putovati, šetati, kliziti, trčati, marširati, stupati, kasati, kaskati, galopirati

## Sheet: ITA
VERBNET CLASS	VERBS
9.1 PUT	collocare, installare, montare, mettere, depositare, posizionare, situare, immergere, inserire
10.1 REMOVE	rimuovere, togliere, abolire, rilasciare, espellere, estrarre, eradicare, staccare, sgombrare, sottrarre, ritrarre, eliminare
11.1 SEND	spedire, inviare, mandare, trasmettere, trasferire, consegnare, trasportare, inoltrare
13.5.1 GET	vincere, guadagnare, comprare, acquistare, ottenere, prenotare, riservare, prendere, raggiungere, raccogliere, noleggiare, conservare
18.1 HIT	picchiare, battere, percuotere, schiaffeggiare, colpire, martellare, frustare, sculacciare, sbattere, urtare
22.2 AMALGAMATE	contrastare, sovrapporre, unire, affiliare, integrare, incorporare, paragonare, correlare, alternare
29.2 CHARACTERIZE	prevedere, ritrarre, raffigurare, riguardare, trattare, elencare, definire, diagnosticare, identificare, riconoscere, ristabilire, classificare
30.3 PEER	ascoltare, fissare, osservare, scrutare, guardare, sbirciare, spiare
31.1 AMUSE	dilettare, impaurire, scioccare, confondere, turbare, sconvolgere, sovrastare, deludere, esaurire, intimidire, spaventare, stimolare, minacciare
36.1 CORRESPOND	cooperare, collaborare, scontrarsi, concorrere, accoppiarsi, flirtare, interagire, dissentire
37.3 MANNER OF SPEAKING	urlare, gridare, strillare, biascicare, mormorare, ringhiare, sussurrare, brontolare, grugnire, balbettare
37.7 SAY	dire, menzionare, affermare, dichiarare, riportare, annunciare, raccontare, narrare, relazionare, riferire, pronunciare, esclamare, confidare
40.2 NONVERBAL EXPRESSION	sorridere, ridere, digrignare, sospirare, ridacchiare, ansimare, sogghignare, sbadigliare, singhiozzare, russare
43.1 LIGHT EMISSION	brillare, luccicare, risplendere, fiammeggiare, baluginare, scintillare, splendere, sfavillare
45.4 CHANGE OF STATE	ammorbidire, indebolire, limitare, restringere, approfondire, inumidire, moltiplicare, sciogliere, rafforzare, appuntire, accorciare, ampliare, congelare
47.3 MODES OF BEING WITH MOTION	tremare, scuotersi, vacillare, ondeggiare, mulinare, vorticare, traballare, barcollare, svolazzare, diffondersi, tremare, fremere, oscillare
51.3.2 RUN	nuotare, volare, camminare, scivolare, correre, viaggiare, passeggiare, marciare, trottare, galoppare

## Sheet: FIN
VERBNET CLASS	VERBS
9.1 PUT	asettaa, asentaa, kiinnittää, laittaa, panna, kätkeä
10.1 REMOVE	poistaa, lakkauttaa, vapauttaa, vähentää, tuhota, hävittää, katkaista, häätää, vähentää, vetää, takaisin, perua
11.1 SEND	lähettää, postittaa, toimittaa, siirtää, kuljettaa, välittää, lähettää matkaan
13.5.1 GET	ansaita, ostaa, varata, hakea, noutaa, vuokrata
18.1 HIT	lyödä, hakata, nuijia
22.2 AMALGAMATE	yhdistää, liittää
29.2 CHARACTERIZE	nähdä, esittää, kuvailla, määrittää, kuvata
30.3 PEER	kuunnella, tuijottaa, katsella, vilkaista, silmäillä, tuijottaa, tiirailla, tähyillä, kurkkia, kurkata, vilkuilla, töllistellä, mulkaista, tirkistellä
31.1 AMUSE	ilahduttaa, riemastuttaa, ilostuttaa, pelottaa, pelästyttää, pelotella, säikäyttää, säikäytellä, järkyttää, shokeerata, hämätä, hämmentää, järkyttää, hermostuttaa, häkellyttää, väsyttää, uuvuttaa, hiljentää, innostaa, yllyttää, vaientaa, häkeltää, murskata, uhata, vaarantaa, uhkailla
36.1 CORRESPOND	pilailla, tinkiä
37.3 MANNER OF SPEAKING	huutaa, karjua, kiljua, mölistä, ähkiä, huokailla, vaikeroida, voihkia, nurista, mumista, supista, mutista, murista, äristä, ärjähtää, ulvoa, kuiskata, röhkiä, murahtaa, röhkäistä, vikistä, uikuttaa, ulista, änkyttää
37.7 SAY	huutaa, huudahtaa, sanoa, mainita, vastata, ilmoittaa, julistaa, kertoa, selostaa, todeta, raportoida
40.2 NONVERBAL EXPRESSION	hymyillä, nauraa, irvistää, virnistää, henkäistä, huokaista, huoata, huokailla, myhäillä, hykertää, kurtistaa, kikattaa, huohottaa, läähättää, haukotella, nyyhkyttää, kuorsata
43.1 LIGHT EMISSION	loistaa, hohtaa, välkkyä, välähtää, vilkkua, roihuta, loimuta, hehkua, paistaa, liekehtiä, kimaltaa, lepattaa, välkehtiä, kipinöidä, kimmeltää, tuikkia, kimallella, leiskua
45.4 CHANGE OF STATE	kaventaa, syventää, kostuttaa, teroittaa, lyhentää, laajentaa, laventaa, vaimentaa, heikentää, vahventaa
47.3 MODES OF BEING WITH MOTION	tutista, hyllyä, heilua, aaltoilla, heilahdella, täristä, värähdellä, horjua, kieppua, väristä, järistä, järähdellä, keinua, keinahdella, huojahdella, kiertyä, horjua, hoippua, hulmuta, liehua, vaappua, tuulahtaa, vavista, hytistä
51.3.2 RUN	juosta, matkustaa, käveleskellä, kuljeskella, kuljeksia, käppäillä, liukua, lipua, liitää, juosta, marssia, ravata, jolkutella, laukata, nelistää
